# Supplementary material for: Crystalline products of bromoantimonate(iii) oxidation by Br2 in the presence of different cations: diversity of structural types and patterns of halogen bond systems
Source: Royal Society of Chemistry journal article supplement (doi:10.1039/d4ce00207e), 2024-01-01
Supplement: d4ce00207e1.pdf [file d4ce00207e1.pdf]

## Supplementary Information

### Crystalline products of bromoantimonate(III) oxidation by Br<sub>2</sub> in presence of different cations: diversity of structural types and patterns of halogen bond systems

Mikhail A. Bondarenko, Alexander S. Novikov, Maxim N. Sokolov and Sergey A. Adonin\*

**Table S1. SCXRD Experimental details**

|                                                                                                                | <b>1</b>                                                                                                                                                                                   | <b>2</b>                                                                                                                                                                                 | <b>3</b>                                                                                                                                                                                                               | <b>4</b>                                                                                                                                                                                   |
|----------------------------------------------------------------------------------------------------------------|--------------------------------------------------------------------------------------------------------------------------------------------------------------------------------------------|------------------------------------------------------------------------------------------------------------------------------------------------------------------------------------------|------------------------------------------------------------------------------------------------------------------------------------------------------------------------------------------------------------------------|--------------------------------------------------------------------------------------------------------------------------------------------------------------------------------------------|
| Chemical formula                                                                                               | C <sub>28</sub> H <sub>36</sub> Br <sub>15</sub> N <sub>4</sub> Sb <sub>3</sub>                                                                                                            | C <sub>14</sub> H <sub>18</sub> Br <sub>9</sub> N <sub>2</sub> Sb                                                                                                                        | C <sub>15</sub> H <sub>20</sub> Br <sub>9</sub> N <sub>2</sub> Sb                                                                                                                                                      | C <sub>16</sub> H <sub>22</sub> Br <sub>9</sub> N <sub>2</sub> Sb                                                                                                                          |
| <i>M<sub>r</sub></i>                                                                                           | 1992.51                                                                                                                                                                                    | 1055.24                                                                                                                                                                                  | 1069.27                                                                                                                                                                                                                | 1083.29                                                                                                                                                                                    |
| Crystal system, space group                                                                                    | Triclinic, <i>P</i> <sup>-</sup> 1                                                                                                                                                         | Triclinic, <i>P</i> <sup>-</sup> 1                                                                                                                                                       | Orthorhombic, <i>P</i> 2 <sub>1</sub> 2 <sub>1</sub> 2                                                                                                                                                                 | Triclinic, <i>P</i> <sup>-</sup> 1                                                                                                                                                         |
| Temperature (K)                                                                                                | 140                                                                                                                                                                                        | 140                                                                                                                                                                                      | 293                                                                                                                                                                                                                    | 140                                                                                                                                                                                        |
| <i>a</i> , <i>b</i> , <i>c</i> (Å)                                                                             | 11.2062 (2), 15.7756 (3), 16.4774 (3)                                                                                                                                                      | 7.4663 (5), 9.0838 (7), 10.3799 (9)                                                                                                                                                      | 10.7933 (13), 15.7086 (12), 7.8096 (6)                                                                                                                                                                                 | 7.1919 (2), 8.9352 (3), 12.0590 (4)                                                                                                                                                        |
| α, β, γ (°)                                                                                                    | 114.223 (2), 95.122 (2), 106.738 (2)                                                                                                                                                       | 112.483 (7), 95.318 (6), 98.593 (6)                                                                                                                                                      | 90, 90, 90                                                                                                                                                                                                             | 69.046 (3), 74.269 (3), 80.096 (3)                                                                                                                                                         |
| <i>V</i> (Å <sup>3</sup> )                                                                                     | 2471.12 (9)                                                                                                                                                                                | 634.47 (9)                                                                                                                                                                               | 1324.1 (2)                                                                                                                                                                                                             | 694.14 (4)                                                                                                                                                                                 |
| <i>Z</i>                                                                                                       | 2                                                                                                                                                                                          | 1                                                                                                                                                                                        | 2                                                                                                                                                                                                                      | 1                                                                                                                                                                                          |
| μ (mm <sup>-1</sup> )                                                                                          | 13.78                                                                                                                                                                                      | 15.26                                                                                                                                                                                    | 14.63                                                                                                                                                                                                                  | 13.95                                                                                                                                                                                      |
| Crystal size (mm)                                                                                              | 0.21 × 0.17 × 0.11                                                                                                                                                                         | 0.21 × 0.14 × 0.11                                                                                                                                                                       | ××                                                                                                                                                                                                                     | 0.17 × 0.14 × 0.11                                                                                                                                                                         |
| Absorption correction                                                                                          | Multi-scan <i>CrysAlis PRO</i> 1.171.41.123a (Rigaku Oxford Diffraction, 2022) Empirical absorption correction using spherical harmonics, implemented in SCALE3 ABSPACK scaling algorithm. | Multi-scan <i>CrysAlis PRO</i> 1.171.38.46 (Rigaku Oxford Diffraction, 2015) Empirical absorption correction using spherical harmonics, implemented in SCALE3 ABSPACK scaling algorithm. | Multi-scan <i>CrysAlis PRO</i> 1.171.38.41 (Rigaku Oxford Diffraction, 2015) Empirical absorption correction using spherical harmonics, implemented in SCALE3 ABSPACK scaling algorithm.                               | Multi-scan <i>CrysAlis PRO</i> 1.171.41.123a (Rigaku Oxford Diffraction, 2022) Empirical absorption correction using spherical harmonics, implemented in SCALE3 ABSPACK scaling algorithm. |
| <i>T<sub>min</sub></i> , <i>T<sub>max</sub></i>                                                                | 0.311, 1.000                                                                                                                                                                               | 0.257, 1.000                                                                                                                                                                             | 0.333, 1.000                                                                                                                                                                                                           | 0.295, 1.000                                                                                                                                                                               |
| No. of measured, independent and observed [ <i>I</i> > 2σ( <i>I</i> )] reflections                             | 18516, 10746, 8817                                                                                                                                                                         | 4430, 2397, 2001                                                                                                                                                                         | 3825, 2350, 2089                                                                                                                                                                                                       | 5089, 2983, 2539                                                                                                                                                                           |
| <i>R<sub>int</sub></i>                                                                                         | 0.024                                                                                                                                                                                      | 0.036                                                                                                                                                                                    | 0.035                                                                                                                                                                                                                  | 0.026                                                                                                                                                                                      |
| (sin θ/λ) <sub>max</sub> (Å <sup>-1</sup> )                                                                    | 0.682                                                                                                                                                                                      | 0.610                                                                                                                                                                                    | 0.610                                                                                                                                                                                                                  | 0.679                                                                                                                                                                                      |
| <i>R</i> [ <i>F</i> <sup>2</sup> > 2σ( <i>F</i> <sup>2</sup> )], <i>wR</i> ( <i>F</i> <sup>2</sup> ), <i>S</i> | 0.034, 0.064, 1.01                                                                                                                                                                         | 0.041, 0.094, 0.99                                                                                                                                                                       | 0.040, 0.087, 1.03                                                                                                                                                                                                     | 0.033, 0.071, 1.01                                                                                                                                                                         |
| No. of reflections                                                                                             | 10746                                                                                                                                                                                      | 2397                                                                                                                                                                                     | 2350                                                                                                                                                                                                                   | 2983                                                                                                                                                                                       |
| No. of parameters                                                                                              | 454                                                                                                                                                                                        | 121                                                                                                                                                                                      | 124                                                                                                                                                                                                                    | 130                                                                                                                                                                                        |
| No. of restraints                                                                                              | 0                                                                                                                                                                                          | 0                                                                                                                                                                                        | 0                                                                                                                                                                                                                      | 0                                                                                                                                                                                          |
| Δ <sub>max</sub> , Δ <sub>min</sub> (e Å <sup>-3</sup> )                                                       | 1.20, -1.35                                                                                                                                                                                | 1.56, -1.91                                                                                                                                                                              | 0.91, -0.93                                                                                                                                                                                                            | 1.08, -1.00                                                                                                                                                                                |
| Absolute structure                                                                                             | –                                                                                                                                                                                          | –                                                                                                                                                                                        | Flack <i>x</i> determined using 700 quotients [( <i>I</i> <sup>+</sup> )-( <i>I</i> <sup>-</sup> )]/[( <i>I</i> <sup>+</sup> )+( <i>I</i> <sup>-</sup> )] (Parsons, Flack and Wagner, Acta Cryst. B69 (2013) 249-259). | –                                                                                                                                                                                          |
| Absolute structure parameter                                                                                   | –                                                                                                                                                                                          | –                                                                                                                                                                                        | -0.01 (2)                                                                                                                                                                                                              | –                                                                                                                                                                                          |

|                                                                                     | 5                                                                                                                                                                                                            | 6                                                                                                                                                                                                          |
|-------------------------------------------------------------------------------------|--------------------------------------------------------------------------------------------------------------------------------------------------------------------------------------------------------------|------------------------------------------------------------------------------------------------------------------------------------------------------------------------------------------------------------|
| Chemical formula                                                                    | C <sub>17</sub> H <sub>24</sub> Br <sub>9</sub> N <sub>2</sub> Sb                                                                                                                                            | C <sub>18</sub> H <sub>26</sub> Br <sub>12</sub> N <sub>2</sub> Sb <sub>2</sub>                                                                                                                            |
| $M_r$                                                                               | 1097.32                                                                                                                                                                                                      | 1472.83                                                                                                                                                                                                    |
| Crystal system, space group                                                         | Triclinic, <i>P1</i>                                                                                                                                                                                         | Monoclinic, <i>C2/c</i>                                                                                                                                                                                    |
| Temperature (K)                                                                     | 130                                                                                                                                                                                                          | 130                                                                                                                                                                                                        |
| $a, b, c$ (Å)                                                                       | 7.7262 (2), 8.7072 (4), 11.2299 (4)                                                                                                                                                                          | 22.0906 (14), 7.8331 (5), 20.5614 (14)                                                                                                                                                                     |
| $\alpha, \beta, \gamma$ (°)                                                         | 75.662 (4), 82.363 (3), 82.661 (3)                                                                                                                                                                           | 90, 102.413 (7), 90                                                                                                                                                                                        |
| $V$ (Å <sup>3</sup> )                                                               | 721.91 (5)                                                                                                                                                                                                   | 3474.7 (4)                                                                                                                                                                                                 |
| $Z$                                                                                 | 1                                                                                                                                                                                                            | 4                                                                                                                                                                                                          |
| $\mu$ (mm <sup>-1</sup> )                                                           | 13.42                                                                                                                                                                                                        | 15.37                                                                                                                                                                                                      |
| Crystal size (mm)                                                                   | 0.19 × 0.14 × 0.07                                                                                                                                                                                           | 0.21 × 0.16 × 0.10                                                                                                                                                                                         |
| Absorption correction                                                               | Multi-scan<br><i>CrysAlis PRO</i> 1.171.41.123a<br>(Rigaku Oxford Diffraction, 2022)<br>Empirical absorption correction<br>using spherical harmonics,<br>implemented in SCALE3<br>ABSPACK scaling algorithm. | Multi-scan<br><i>CrysAlis PRO</i> 1.171.38.46 (Rigaku<br>Oxford Diffraction, 2015)<br>Empirical absorption correction<br>using spherical harmonics,<br>implemented in SCALE3<br>ABSPACK scaling algorithm. |
| $T_{\min}, T_{\max}$                                                                | 0.424, 1.000                                                                                                                                                                                                 | 0.334, 1.000                                                                                                                                                                                               |
| No. of measured,<br>independent and<br>observed [ $I > 2\sigma(I)$ ]<br>reflections | 5391, 4158, 3775                                                                                                                                                                                             | 8051, 3916, 3314                                                                                                                                                                                           |
| $R_{\text{int}}$                                                                    | 0.026                                                                                                                                                                                                        | 0.025                                                                                                                                                                                                      |
| $(\sin \theta/\lambda)_{\text{max}}$ (Å <sup>-1</sup> )                             | 0.683                                                                                                                                                                                                        | 0.684                                                                                                                                                                                                      |
| $R[F^2 > 2\sigma(F^2)],$<br>$wR(F^2), S$                                            | 0.034, 0.071, 0.98                                                                                                                                                                                           | 0.025, 0.054, 1.00                                                                                                                                                                                         |
| No. of reflections                                                                  | 4158                                                                                                                                                                                                         | 3916                                                                                                                                                                                                       |
| No. of parameters                                                                   | 263                                                                                                                                                                                                          | 156                                                                                                                                                                                                        |
| No. of restraints                                                                   | 3                                                                                                                                                                                                            | 0                                                                                                                                                                                                          |
| $\Delta\rho_{\text{max}}, \Delta\rho_{\text{min}}$ (e Å <sup>-3</sup> )             | 0.88, -1.02                                                                                                                                                                                                  | 1.09, -0.79                                                                                                                                                                                                |
| Absolute structure                                                                  | Refined as an inversion twin.                                                                                                                                                                                | –                                                                                                                                                                                                          |
| Absolute structure<br>parameter                                                     | 0.151 (16)                                                                                                                                                                                                   | –                                                                                                                                                                                                          |

Computer programs: *CrysAlis PRO* 1.171.41.123a (Rigaku OD, 2022), *CrysAlis PRO* 1.171.38.46 (Rigaku OD, 2015), *SHELXT* 2014/5 (Sheldrick, 2014), *SHELXL2019/2* (Sheldrick, 2019), *SHELXL2014/7* (Sheldrick, 2014).

**Powder X-ray Diffractometry.** XRD analysis of polycrystals was performed on Shimadzu XRD-7000 diffractometer (CuK-alpha radiation, Ni – filter, linear One Sight detector, 0.0143° 2θ step, 2s per step). Plotting of PXRD patterns and data treatment was performed using X'Pert Plus software. In all cases red line is synthesized, blue is simulated.

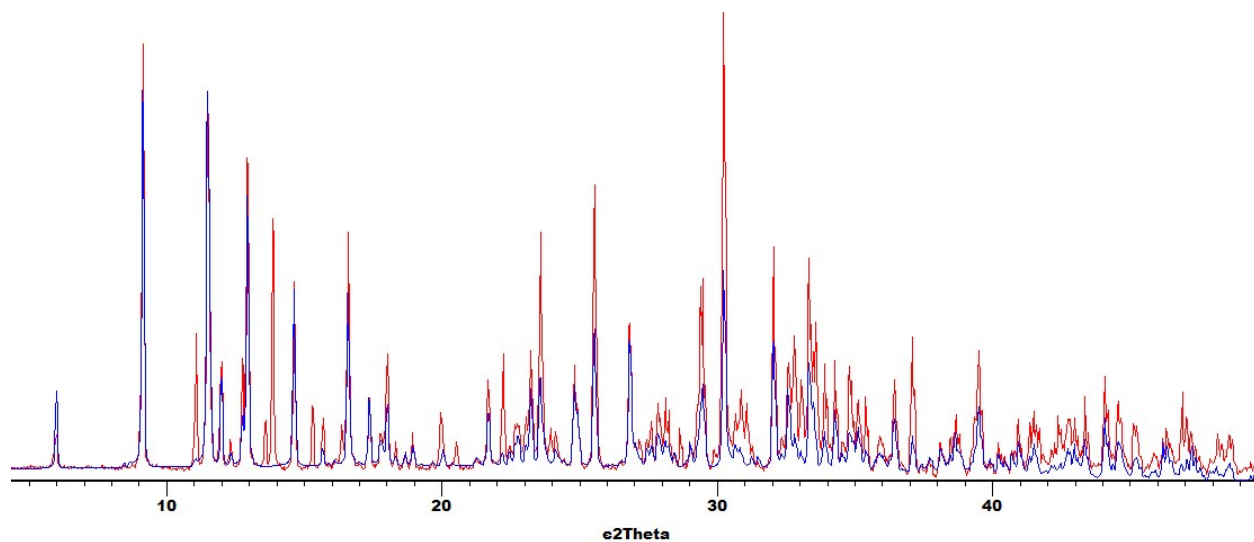

**Figure 1S.** PXRD data for 1

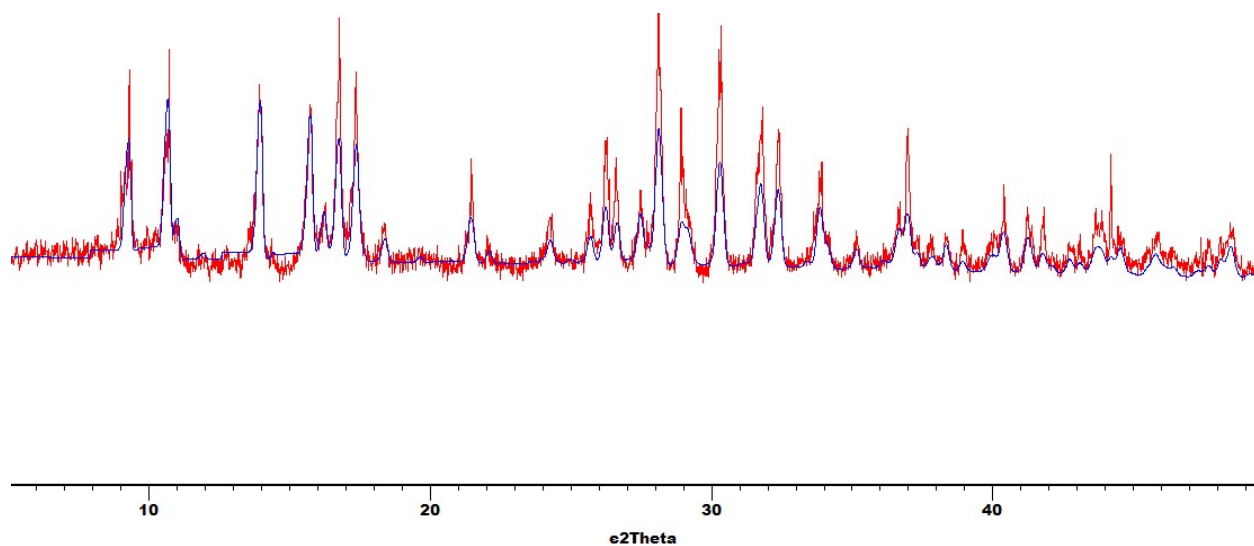

**Figure 2S.** PXRD data for 2

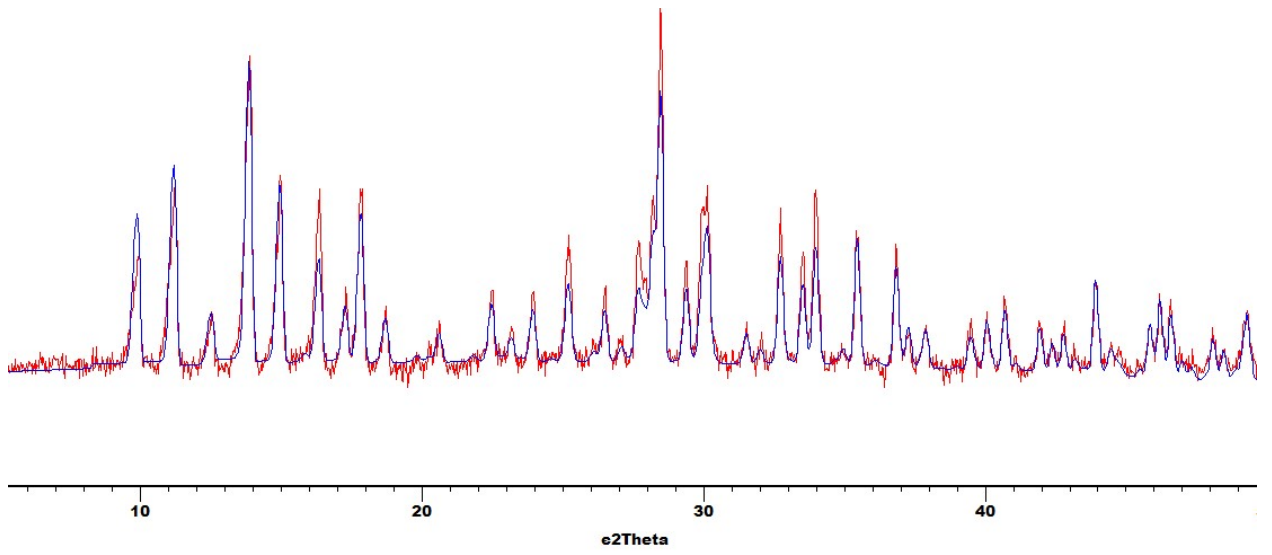

**Figure 3S.** PXRD data for 3

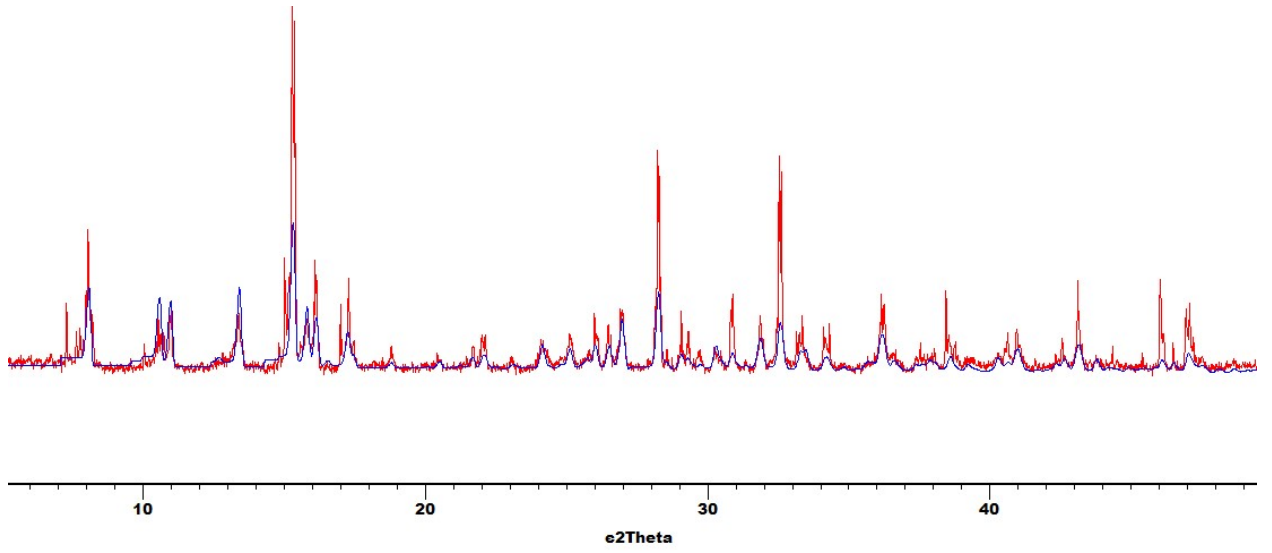

**Figure 4S.** PXRD data for 4

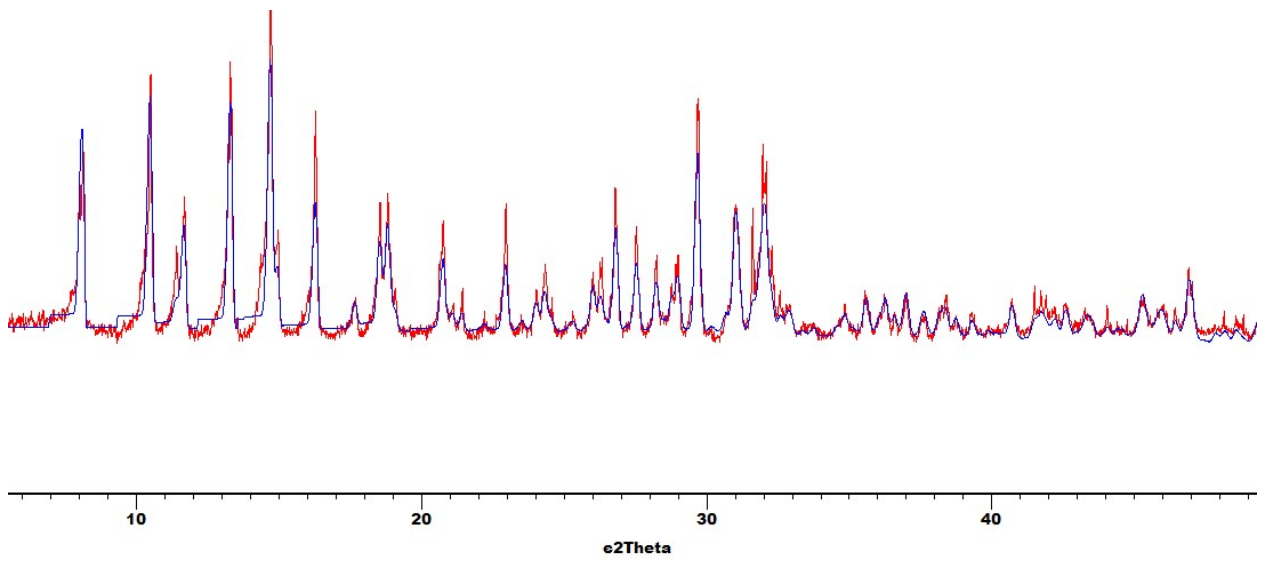

**Figure 5S.** PXRD data for 5

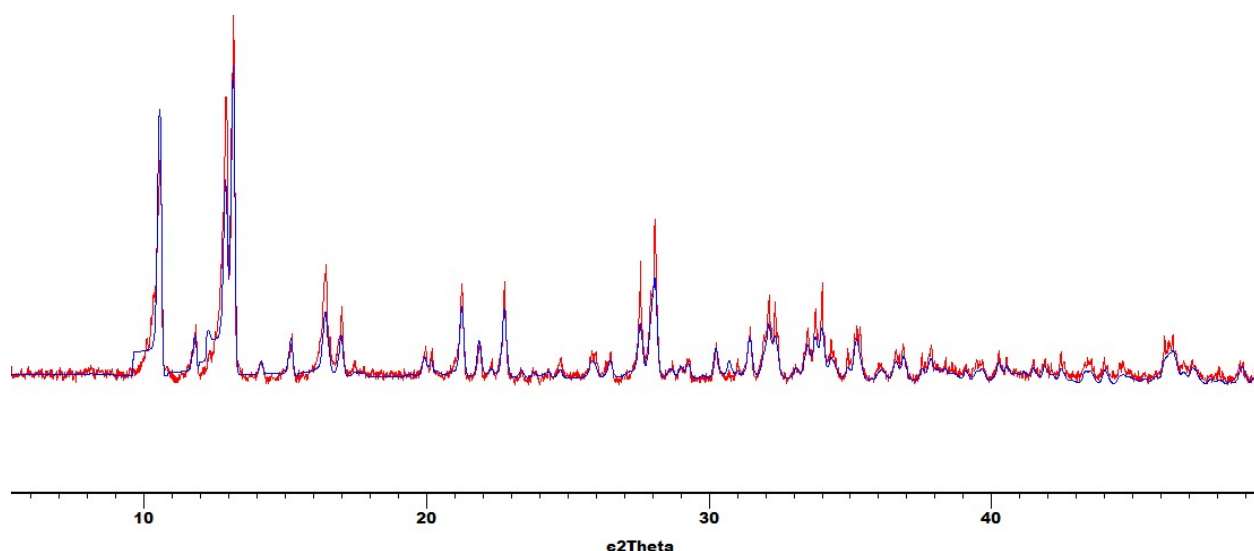

**Figure 6S.** PXRD data for **6**

### Computational details

The DFT calculations based on the obtained experimental X-ray geometries of **1–6** have been carried out using the M06 functional with the help of Gaussian-09 [M. J. Frisch et al. Gaussian 09, Revision C.01, Gaussian, Inc., Wallingford, CT, 2010.] program package. The Douglas–Kroll–Hess 2<sup>nd</sup> order scalar relativistic calculations requested relativistic core Hamiltonian were carried out using the DZP-DKH basis sets [Mol. Phys. 2010, 108, 1965. || J. Chem. Phys. 2009, 130, 064108. || Chem. Phys. Lett. 2013, 582, 158. || J. Mol. Struct. - Theochem 2010, 961, 107.] for all atoms. Note that this level of theory was also successfully used in our previous studies of such chemical systems (viz. Sb(III) and Sb(V) coordination compounds with halide ligands) [Chem. Eur. J. 2018, 24, 10165. || Chem. Eur. J. 2018, 24, 14707. || CrystEngComm 2019, 21, 850. || Z. Anorg. Allg. Chem. 2019, 645, 1141. || Inorg. Chim. Acta 2020, 502, 119278.]. The topological analysis of the electron density distribution has been performed by using the Multiwfn program (version 3.7) [J. Comput. Chem. 2012, 33, 580.]. The Cartesian atomic coordinates for model structures are presented in **Table S2**.

**Table S2.** Cartesian atomic coordinates for model supramolecular associates.

| Atom     | X         | Y         | Z         |
|----------|-----------|-----------|-----------|
| <b>1</b> |           |           |           |
| Br       | -4.373956 | 0.190208  | 12.116199 |
| Br       | -3.734120 | -2.471227 | 14.488584 |
| Br       | -1.258348 | 0.040606  | 13.984856 |
| Sb       | -3.742701 | 0.051606  | 14.596599 |
| Br       | -3.111446 | -0.086995 | 17.076999 |
| Br       | -3.751283 | 2.574440  | 14.704614 |
| Br       | -6.227054 | 0.062607  | 15.208343 |
| Br       | 1.006019  | -7.483213 | 13.971281 |
| Br       | -1.485341 | -4.984801 | 14.820511 |

|    |            |            |           |
|----|------------|------------|-----------|
| Br | -0.847202  | -7.729385  | 17.069263 |
| Sb | -1.471049  | -7.502001  | 14.596599 |
| Br | -3.948116  | -7.520789  | 15.221917 |
| Br | -1.456756  | -10.019202 | 14.372687 |
| Br | -2.094896  | -7.274617  | 12.123935 |
| Br | 1.577295   | 2.012796   | 8.798392  |
| Br | -0.384125  | -1.017015  | 8.269119  |
| Br | 2.715668   | -3.450806  | 8.584260  |
| Br | 1.891116   | -0.751909  | 11.359657 |
| Br | 2.468512   | -0.298399  | 5.695447  |
| Br | 5.241993   | 0.123286   | 8.784087  |
| Br | 8.096487   | 0.333096   | 6.233624  |
| Br | 5.065780   | 2.491699   | 5.915418  |
| Br | 5.798252   | 0.229034   | 3.207165  |
| Sb | 5.554231   | 0.013064   | 5.831633  |
| Sb | 2.119326   | -0.603846  | 8.735335  |
| Br | 13.683267  | 0.018788   | -0.625318 |
| Br | 11.191907  | 2.517200   | 0.223912  |
| Br | 11.830047  | -0.227384  | 2.472664  |
| Sb | 11.206200  | 0.000000   | 0.000000  |
| Br | 8.729133   | -0.018788  | 0.625318  |
| Br | 11.220493  | -2.517200  | -0.223912 |
| Br | 10.582353  | 0.227384   | -2.472664 |
| Br | 3.614552   | 5.592418   | 5.798207  |
| Br | 5.575971   | 8.622228   | 6.327480  |
| Br | 2.476178   | 11.056019  | 6.012339  |
| Br | 3.300731   | 8.357123   | 3.236942  |
| Br | 2.723335   | 7.903613   | 8.901152  |
| Br | -0.050146  | 7.481928   | 5.812512  |
| Br | -2.904641  | 7.272117   | 8.362975  |
| Br | 0.126066   | 5.113515   | 8.681181  |
| Br | -0.606406  | 7.376180   | 11.389434 |
| Sb | -0.362384  | 7.592149   | 8.764966  |
| Sb | 3.072521   | 8.209059   | 5.861264  |
| Br | -9.628905  | 2.012796   | 8.798392  |
| Br | -11.590325 | -1.017015  | 8.269119  |
| Br | -8.490532  | -3.450806  | 8.584260  |
| Br | -9.315084  | -0.751909  | 11.359657 |
| Br | -8.737688  | -0.298399  | 5.695447  |
| Br | -5.964207  | 0.123286   | 8.784087  |
| Br | -3.109713  | 0.333096   | 6.233624  |
| Br | -6.140420  | 2.491699   | 5.915418  |
| Br | -5.407948  | 0.229034   | 3.207165  |
| Sb | -5.651969  | 0.013064   | 5.831633  |
| Sb | -9.086874  | -0.603846  | 8.735335  |
| Br | 2.477067   | 0.018788   | -0.625318 |
| Br | -0.014293  | 2.517200   | 0.223912  |
| Br | 0.623847   | -0.227384  | 2.472664  |

|          |           |           |           |
|----------|-----------|-----------|-----------|
| Sb       | 0.000000  | 0.000000  | 0.000000  |
| Br       | -2.477067 | -0.018788 | 0.625318  |
| Br       | 0.014293  | -2.517200 | -0.223912 |
| Br       | -0.623847 | 0.227384  | -2.472664 |
| <b>2</b> |           |           |           |
| Sb       | 1.894876  | 6.901927  | 4.730560  |
| Br       | 1.865746  | 4.787228  | 3.287739  |
| Br       | 3.542293  | 5.792136  | 6.285968  |
| Br       | 3.838376  | 7.800250  | 3.321704  |
| Br       | 1.924006  | 9.016625  | 6.173381  |
| Br       | 0.247459  | 8.011718  | 3.175152  |
| Br       | -0.048624 | 6.003604  | 6.139415  |
| Br       | 0.000000  | 0.000000  | 0.000000  |
| Br       | 0.581121  | 2.049289  | 1.388325  |
| Br       | -0.581121 | -2.049289 | -1.388325 |
| Sb       | -5.571424 | 6.901927  | 4.730560  |
| Br       | -5.600554 | 4.787228  | 3.287739  |
| Br       | -3.924007 | 5.792136  | 6.285968  |
| Br       | -3.627924 | 7.800250  | 3.321704  |
| Br       | -5.542294 | 9.016625  | 6.173381  |
| Br       | -7.218841 | 8.011718  | 3.175152  |
| Br       | -7.514924 | 6.003604  | 6.139415  |
| Br       | -1.357252 | 8.981831  | 0.000000  |
| Br       | -0.776131 | 11.031121 | 1.388325  |
| Br       | -1.938373 | 6.932542  | -1.388325 |
| <b>3</b> |           |           |           |
| Sb       | 5.396650  | 0.000000  | 1.295144  |
| Br       | 7.155310  | 0.423975  | 3.103145  |
| Br       | 4.810574  | 2.479917  | 1.335364  |
| Br       | 3.646948  | -0.424603 | -0.525742 |
| Br       | 3.637990  | -0.423975 | 3.103145  |
| Br       | 5.982726  | -2.479917 | 1.335364  |
| Br       | 7.146352  | 0.424603  | -0.525742 |
| Br       | 4.301238  | 5.576710  | 2.704386  |
| Br       | 5.396650  | 7.854300  | 2.720865  |
| Br       | 6.492062  | 10.131890 | 2.704386  |
| Br       | 11.888712 | -2.277590 | 5.105214  |
| Br       | 10.793300 | 0.000000  | 5.088735  |
| Br       | 9.697888  | 2.277590  | 5.105214  |
| Br       | 11.888712 | -2.277590 | -2.704386 |
| Br       | 10.793300 | -0.000000 | -2.720865 |
| Br       | 9.697888  | 2.277590  | -2.704386 |
| Br       | 1.095412  | -2.277590 | 5.105214  |
| Br       | 0.000000  | 0.000000  | 5.088735  |
| Br       | -1.095412 | 2.277590  | 5.105214  |
| Br       | 1.095412  | -2.277590 | -2.704386 |
| Br       | -0.000000 | -0.000000 | -2.720865 |
| Br       | -1.095412 | 2.277590  | -2.704386 |

| 4  |           |           |           |
|----|-----------|-----------|-----------|
| Br | 8.179661  | 5.366467  | 6.434213  |
| Br | 5.978892  | 4.483575  | 3.686311  |
| Br | 7.309041  | 7.833372  | 3.914499  |
| Sb | 5.999093  | 6.304478  | 5.482645  |
| Br | 3.818526  | 7.242488  | 4.531077  |
| Br | 6.019295  | 8.125380  | 7.278979  |
| Br | 4.689146  | 4.775583  | 7.050791  |
| Br | 6.693414  | 1.788050  | 1.734161  |
| Br | 7.191900  | 0.000000  | 0.000000  |
| Br | 7.690386  | -1.788050 | -1.734161 |
| Br | 8.230249  | 10.590092 | 1.734161  |
| Br | 8.728735  | 8.802042  | 0.000000  |
| Br | 9.227221  | 7.013991  | -1.734161 |
| Br | 15.371561 | 5.366467  | 6.434213  |
| Br | 13.170792 | 4.483575  | 3.686311  |
| Br | 14.500941 | 7.833372  | 3.914499  |
| Sb | 13.190993 | 6.304478  | 5.482645  |
| Br | 11.010426 | 7.242488  | 4.531077  |
| Br | 13.211195 | 8.125380  | 7.278979  |
| Br | 11.881046 | 4.775583  | 7.050791  |
| 5  |           |           |           |
| Br | -0.205978 | 1.757720  | 9.965108  |
| Br | 1.329627  | -0.746017 | 7.845671  |
| Br | -0.332553 | 2.073373  | 6.324662  |
| Br | 1.649826  | 4.381919  | 8.229007  |
| Br | 3.336292  | 1.560052  | 9.830621  |
| Sb | 1.486474  | 1.823198  | 8.086622  |
| Br | 3.264665  | 1.874430  | 6.245355  |
| Br | 3.893534  | -1.145432 | 1.996743  |
| Br | 4.568874  | 1.204587  | 2.691249  |
| Br | 5.363814  | 3.493354  | 3.471878  |
| Br | 5.385948  | 1.466315  | 12.816269 |
| Br | 6.061288  | 3.816333  | 13.510774 |
| Br | 6.856228  | 6.105100  | 14.291403 |
| Br | 0.906277  | 10.393588 | 9.965108  |
| Br | 2.441882  | 7.889851  | 7.845671  |
| Br | 0.779703  | 10.709241 | 6.324662  |
| Br | 2.762082  | 13.017788 | 8.229007  |
| Br | 4.448547  | 10.195920 | 9.830621  |
| Sb | 2.598729  | 10.459066 | 8.086622  |
| Br | 4.376920  | 10.510298 | 6.245355  |
| Br | -2.340252 | 1.466315  | 12.816269 |
| Br | -1.664912 | 3.816333  | 13.510774 |
| Br | -0.869972 | 6.105100  | 14.291403 |
| Br | -3.832666 | -1.145432 | 1.996743  |
| Br | -3.157326 | 1.204587  | 2.691249  |
| Br | -2.362386 | 3.493354  | 3.471878  |



| 6  |           |           |           |
|----|-----------|-----------|-----------|
| Sb | 3.312742  | -1.958275 | 10.040374 |
| Br | 4.827004  | -0.731455 | 11.668521 |
| Br | 2.553172  | 0.278232  | 9.082321  |
| Br | 5.209453  | -2.028616 | 8.333108  |
| Br | 1.798481  | -3.185095 | 8.412227  |
| Br | 4.072313  | -4.194782 | 10.998426 |
| Br | 1.416032  | -1.887934 | 11.747639 |
| Sb | 7.730439  | -4.762446 | 15.060560 |
| Br | 8.496845  | -2.998746 | 16.693125 |
| Br | 5.431511  | -4.856209 | 16.140302 |
| Br | 6.944328  | -6.575809 | 13.419160 |
| Br | 6.964033  | -2.998746 | 13.427996 |
| Br | 10.029366 | -4.856209 | 13.980819 |
| Br | 8.516549  | -6.575809 | 16.701961 |
| Sb | -1.104954 | -6.987204 | 5.020187  |
| Br | -1.871360 | -8.750904 | 3.387622  |
| Br | 1.193974  | -6.893441 | 3.940445  |
| Br | -0.318844 | -5.173841 | 6.661587  |
| Br | -0.338548 | -8.750904 | 6.652752  |
| Br | -3.403881 | -6.893441 | 6.099929  |
| Br | -1.891064 | -5.173841 | 3.378787  |
| Sb | -3.314861 | -0.845896 | 15.060560 |
| Br | -2.548455 | 0.917804  | 16.693125 |
| Br | -5.613789 | -0.939659 | 16.140302 |
| Br | -4.100972 | -2.659259 | 13.419160 |
| Br | -4.081267 | 0.917804  | 13.427996 |
| Br | -1.015934 | -0.939659 | 13.980819 |
| Br | -2.528751 | -2.659259 | 16.701961 |

**Table S3.** Values of the density of all electrons –  $\rho(\mathbf{r})$ , Laplacian of electron density –  $\nabla^2\rho(\mathbf{r})$  and appropriate  $\lambda_2$  eigenvalues, energy density –  $H_b$ , potential energy density –  $V(\mathbf{r})$ , Lagrangian kinetic energy –  $G(\mathbf{r})$ , and electron localization function – ELF (a.u.) at the bond critical points (3, –1), corresponding to noncovalent interactions Br...Br in the X-ray structures **1-6**, and estimated strength for these interactions  $E_{\text{int}}$  (kcal/mol).

| Contact Br...Br* | % vdW radii sum | $\rho(\mathbf{r})$ | $\nabla^2\rho(\mathbf{r})$ | $\lambda_2$ | $H_b$ | $V(\mathbf{r})$ | $G(\mathbf{r})$ | ELF   | $E_{\text{int}}^{**}$ |
|------------------|-----------------|--------------------|----------------------------|-------------|-------|-----------------|-----------------|-------|-----------------------|
| <b>1</b>         |                 |                    |                            |             |       |                 |                 |       |                       |
| 3.389 Å          | 93              | 0.014              | 0.036                      | -0.014      | 0.001 | -0.008          | 0.009           | 0.063 | 2.9                   |
| 3.426 Å          | 94              | 0.011              | 0.028                      | -0.011      | 0.001 | -0.006          | 0.007           | 0.053 | 2.2                   |
| 3.660 Å          | 100             | 0.008              | 0.019                      | -0.008      | 0.000 | -0.004          | 0.004           | 0.041 | 1.5                   |
| 3.693 Å          | 101             | 0.008              | 0.019                      | -0.008      | 0.001 | -0.004          | 0.005           | 0.040 | 1.5                   |
| 3.714 Å          | 101             | 0.007              | 0.015                      | -0.007      | 0.001 | -0.003          | 0.004           | 0.045 | 1.1                   |
| 3.914 Å          | 107             | 0.005              | 0.013                      | -0.005      | 0.000 | -0.003          | 0.003           | 0.023 | 1.1                   |
| <b>2</b>         |                 |                    |                            |             |       |                 |                 |       |                       |
| 3.571 Å          | 98              | 0.009              | 0.021                      | -0.009      | 0.000 | -0.005          | 0.005           | 0.044 | 1.8                   |
| 3.655 Å          | 100             | 0.009              | 0.021                      | -0.009      | 0.000 | -0.005          | 0.005           | 0.041 | 1.8                   |
| 3.688 Å          | 101             | 0.008              | 0.020                      | -0.008      | 0.001 | -0.004          | 0.005           | 0.032 | 1.5                   |
| 3.884 Å          | 106             | 0.006              | 0.014                      | -0.006      | 0.000 | -0.003          | 0.003           | 0.024 | 1.1                   |
| <b>3</b>         |                 |                    |                            |             |       |                 |                 |       |                       |
| 3.424 Å          | 94              | 0.012              | 0.030                      | -0.012      | 0.000 | -0.007          | 0.007           | 0.059 | 2.5                   |
| 3.729 Å          | 102             | 0.008              | 0.019                      | -0.008      | 0.000 | -0.004          | 0.004           | 0.035 | 1.5                   |
| 3.833 Å          | 105             | 0.006              | 0.016                      | -0.006      | 0.000 | -0.004          | 0.004           | 0.027 | 1.5                   |
| <b>4</b>         |                 |                    |                            |             |       |                 |                 |       |                       |
| 3.404 Å          | 93              | 0.011              | 0.028                      | -0.011      | 0.001 | -0.006          | 0.007           | 0.059 | 2.2                   |
| 3.633 Å          | 99              | 0.009              | 0.021                      | -0.009      | 0.000 | -0.005          | 0.005           | 0.048 | 1.8                   |
| 3.799 Å          | 104             | 0.007              | 0.016                      | -0.007      | 0.000 | -0.004          | 0.004           | 0.029 | 1.5                   |
| <b>5</b>         |                 |                    |                            |             |       |                 |                 |       |                       |
| 3.573 Å          | 98              | 0.010              | 0.024                      | -0.010      | 0.001 | -0.005          | 0.006           | 0.048 | 1.8                   |
| 3.617 Å          | 99              | 0.008              | 0.018                      | -0.008      | 0.000 | -0.004          | 0.004           | 0.046 | 1.5                   |
| 3.623 Å          | 99              | 0.009              | 0.022                      | -0.009      | 0.000 | -0.005          | 0.005           | 0.045 | 1.8                   |
| 3.778 Å          | 103             | 0.007              | 0.017                      | -0.007      | 0.000 | -0.004          | 0.004           | 0.031 | 1.5                   |
| 3.837 Å          | 105             | 0.006              | 0.016                      | -0.006      | 0.000 | -0.003          | 0.004           | 0.025 | 1.1                   |
| 3.845 Å          | 105             | 0.006              | 0.016                      | -0.006      | 0.001 | -0.003          | 0.004           | 0.023 | 1.1                   |
| <b>6</b>         |                 |                    |                            |             |       |                 |                 |       |                       |
| 3.392 Å          | 93              | 0.011              | 0.029                      | -0.011      | 0.001 | -0.006          | 0.007           | 0.056 | 2.2                   |
| 3.435 Å          | 94              | 0.011              | 0.027                      | -0.011      | 0.000 | -0.006          | 0.006           | 0.053 | 2.2                   |
| 3.578 Å          | 98              | 0.009              | 0.023                      | -0.009      | 0.000 | -0.005          | 0.005           | 0.048 | 1.8                   |

\* The Bondi's van der Waals (vdW) radius for bromine atom is 1.83 Å.

\*\*  $E_{\text{int}} = 0.58(-V(\mathbf{r}))$  (this empirical correlation between the interaction energy and the potential energy density of electrons at the bond critical points (3, –1) was specifically developed for noncovalent interactions involving bromine atoms).

**Thermogravimetric** analyses were carried out on a TG 209 F1 Iris thermobalance (NETZSCH, Germany). The measurements were made in a helium flow in the temperature range of 30–450°C using the heating rate of 10°C/min the gas flow rate of 60 mL/min and open Al crucibles.

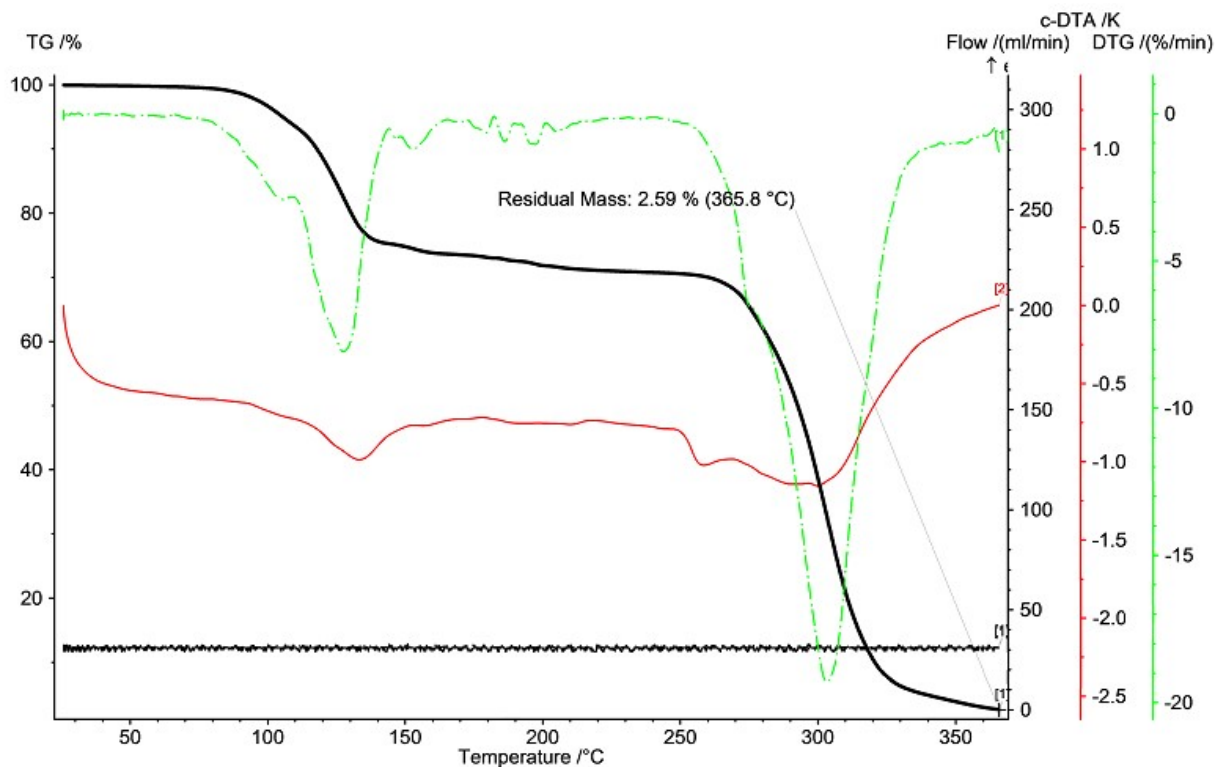

**Figure 7S.** TGA experiment for 2

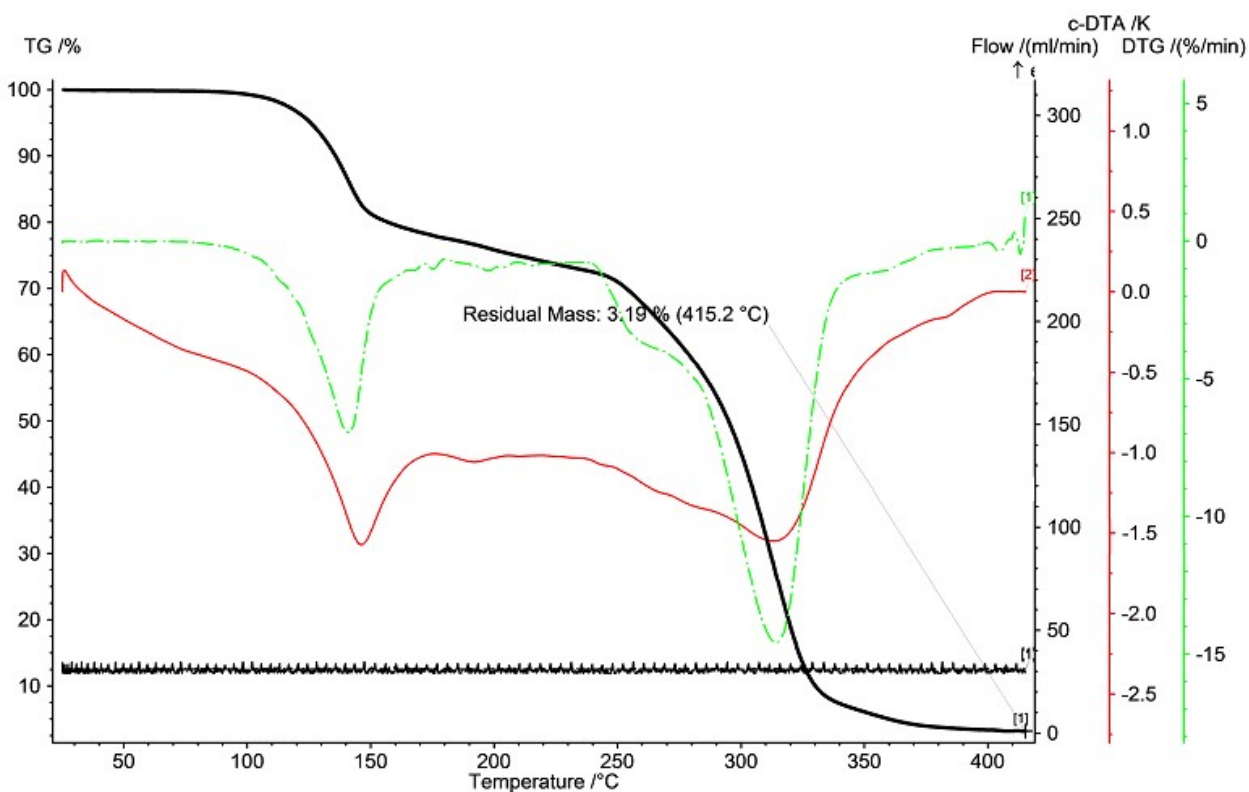

**Figure 8S.** TGA experiment for 3

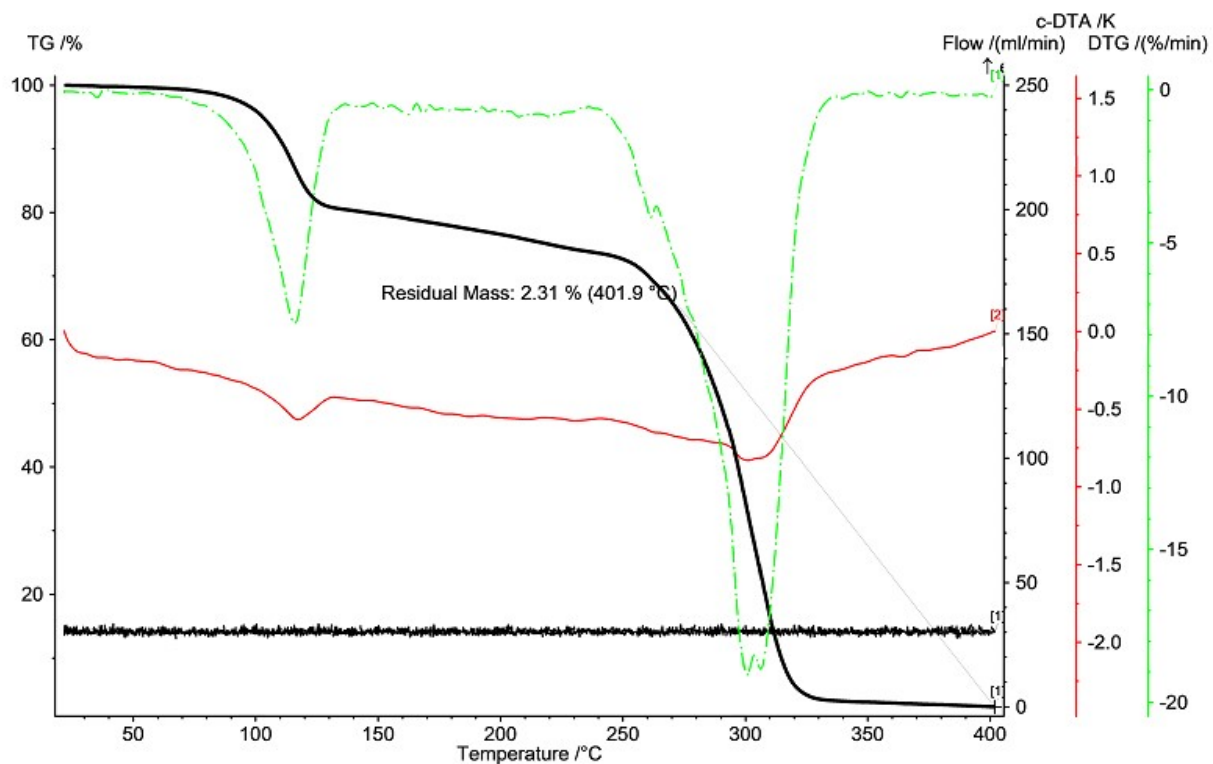

Figure 9S. TGA experiment for 4

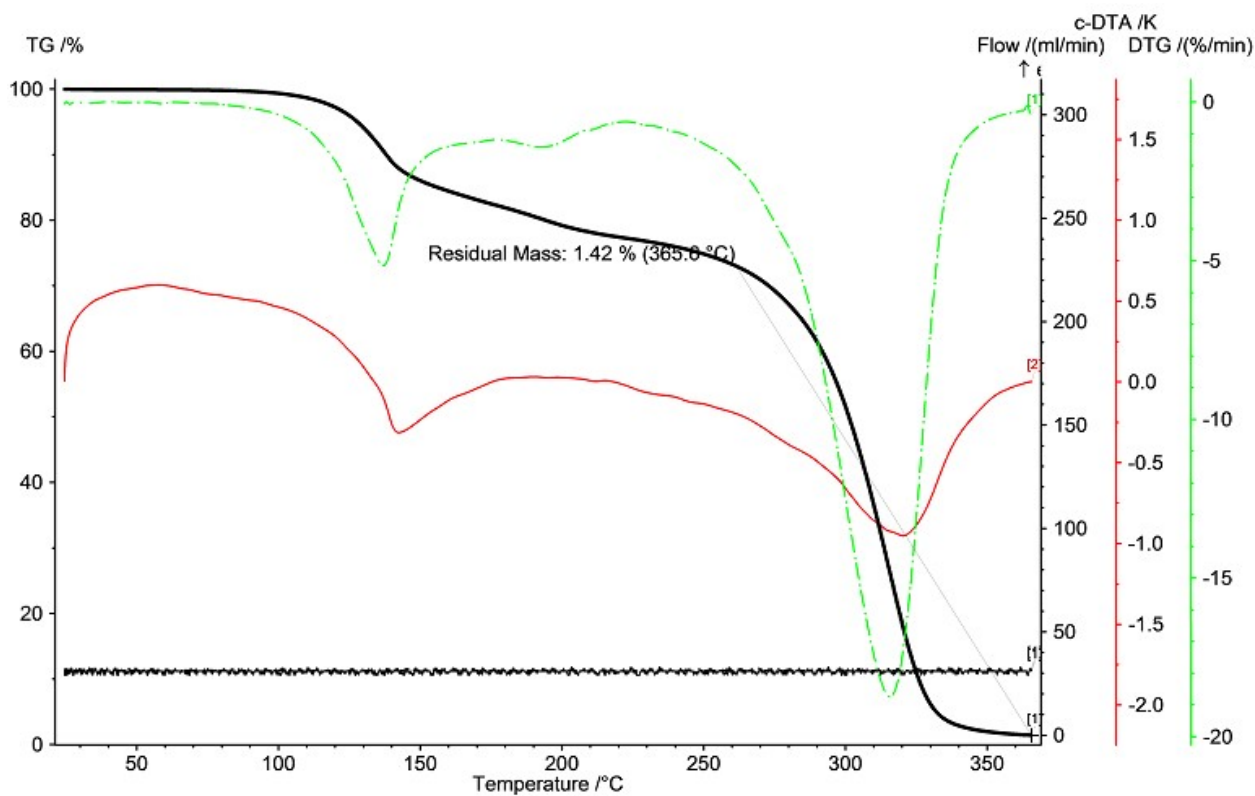

Figure 10S. TGA experiment for 6
